# Supplementary material
Source: publisher figshare collection journal article supplement (https://frontiersin.figshare.com/ndownloader/files/33943880)
Supplement: Supplementary file [file 33943880]

Supplement Table 2. Hospitals in 14 provinces in our study

| Provinces | Hospitals                                                                               |
|-----------|-----------------------------------------------------------------------------------------|
| Hubei     | Renmin Hospital of Wuhan University                                                     |
|           | Zhongnan Hospital of Wuhan University                                                   |
|           | Union Hospital, Tongji Medical College, Huazhong University of Science and Technology   |
|           | Tongji Hospital, Tongji Medical College, Huazhong University of Science and Technology, |
| Henan     | Henan provincial people's Hospital                                                      |
|           | The First Affiliated Hospital of Zhengzhou University                                   |
|           | The Fifth Affiliated Hospital of Zhengzhou University                                   |
| Hunan     | Xiangya Hospital of Central South University                                            |
|           | The Third Xiangya Hospital of Central South University                                  |
| Shanghai  | Shanghai Jiaotong University Affiliated First People's Hospital                         |
| Zhejiang  | The Second Affiliated Hospital of Zhejiang University                                   |
|           | First Affiliated Hospital of College of Medicine, Zhejiang University,                  |
|           | The First Affiliated Hospital of Wenzhou Medical University                             |
| Fujian    | Fujian Provincial Hospital                                                              |
|           | Fujian Medical University Union Hospital,                                               |
| Jiangsu   | Northern Jiangsu People's Hospital                                                      |
| Jiangxi   | Jiangxi Provincial People's Hospital                                                    |
| Chongqing | The Second Affiliated Hospital of Chongqing Medical University                          |
| Sichuan   | Sichuan Academy of Medical Sciences & Sichuan Provincial People's Hospital              |
|           | Affiliated Hospital of North Sichuan Medical College                                    |
|           |                                                                                         |
| Guizhou   | Guizhou Provincial People's Hospital                                                    |
| Guangxi   | The First Affiliated Hospital of Guangxi Medical University                             |
| Hainan    | Hainan General Hospital                                                                 |
| Guangdong | The First Affiliated Hospital of Shenzhen University                                    |
